# Scallop enables accurate assembly of transcripts through phasing-preserving graph decomposition

Mingfu Shao<sup>\*1</sup> and Carl Kingsford<sup>†1</sup>

<sup>1</sup>Computational Biology Department, School of Computer Science, Carnegie Mellon University

April 3, 2017

**We introduce Scallop, an accurate, reference-based transcript assembler for RNA-seq data. Scallop significantly improves reconstruction of multi-exon and lowly expressed transcripts. On 10 human samples aligned with STAR, Scallop produces (on average) 35.7% and 37.5% more correct multi-exon transcripts than two leading transcript assemblers, StringTie [1] and TransComb [2], respectively. For transcripts expressed at low levels in the same samples, Scallop assembles 65.2% and 50.2% more correct multi-exon transcripts than StringTie and TransComb, respectively. Scallop obtains this improvement through a novel algorithm that we prove preserves all phasing paths from reads (including paired-end reads), while also producing a parsimonious set of transcripts and minimizing coverage deviation.**

RNA sequencing (RNA-seq) is an established technology that enables identification of novel genes and splice variants as well as accurate measurement of expression abundances [3]. The RNA-seq protocol produces short sequencing reads sampled from the expressed transcripts, and transcript assembly is the fundamental computational problem to reconstruct the full-length expressed transcripts from the reads. This step is crucial for transcript quantification and differential expression analysis, and also plays a central role in revealing tissue-specific splicing patterns [4] and understanding the regulation of gene expressions [5].

Transcript assembly methods can be divided into reference-based (or genome-guided) methods and *de*

---

\*mingfu.shao@cs.cmu.edu

†carlk@cs.cmu.edu

22 *novo* methods, depending on whether a reference genome is assumed to be available. Reference-based  
23 methods (e.g., Cufflinks [6], Scripture [7], IsoLasso [8], SLIDE [9], CLIQ [10], CEM [11], MITIE [12],  
24 iReckon [13], Traph [14], Bayesemblem [15], StringTie [1], CIDANE [16] and TransComb [2]) usually first  
25 use the read alignments produced by an RNA-seq aligner (e.g., TopHat2 [17], SpliceMap [18], STAR [19],  
26 and HISAT [20]) to build a so-called splice graph for each gene loci. In the splice graph, vertices correspond  
27 to exons (or partial exons), edges correspond to splice junctions, and coverage of exons and abundance of  
28 splice junctions are encoded as weights of vertices or edges. The expressed transcripts, represented as a set  
29 of paths of the splice graph, are inferred so as to mostly fit the topology and the weights of the splice graph.  
30 For instance, StringTie [1] iteratively computes the heaviest path in the splice graph, collect that path, and  
31 updates the weights of the remaining splice graph via a max-flow formulation. TransComb [2] employs a  
32 bin-packing strategy to gradually reconstruct paths guided by the weighted junction graph [21]. *De novo* as-  
33 sembly methods (e.g., TransABYSS [22], Rnnotator [23], Trinity [24], SOAPdenovo-Trans [25], Velvet [26],  
34 Oases [27], IDBA-Tran [28], and BinPacker [21]), are mainly used for non-model species and cancer sam-  
35 ples, for which a reference genome is unavailable or significantly diverged. When a high-quality reference  
36 genome is available, reference-based methods usually obtain better accuracy, since they can tolerate much  
37 lower read coverage inside exons.

38 Transcript assembly remains an open and challenging problem, due to the ubiquity of paralogs, unevenness  
39 of read coverage, and diversity of splice variants. According to the benchmarking studies [29, 30], the accu-  
40 racies of existing transcript assembly methods are still very low, especially for lowly expressed transcripts  
41 and those genes with multiple spliced isoforms. Hence, new algorithmic ideas are needed to produce more  
42 accurate transcript assemblies.

43 Scallop is a reference-based transcript assembler that enables accurate identification of multi-exon tran-  
44 scripts and lowly expressed transcripts. Scallop obtains higher accuracy through a novel algorithm to de-  
45 compose splice graph into transcripts. Our algorithm fully takes advantage of the phasing information  
46 derived from the reads (including paired-end reads) spanning more than two exons. Such phasing informa-  
47 tion is organized as a set of phasing paths, and our algorithm can be proved to preserve all phasing paths  
48 (except for those with false negative edges). This theoretical guarantee is achieved through subroutines to  
49 decompose the splice graph so as to not to break any phasing path. In addition, our algorithm simultaneously  
50 optimizes two other objectives of minimizing the read coverage deviation and minimizing the number of ex-

51 pressed transcripts. To minimize the deviation from the observed read coverage, we formulate and solve a  
52 linear programming problem as a subroutine. We also identify when these linear programming instances  
53 have multiple optimal solutions and use the abundance of the phasing paths to adjust them via another linear  
54 programming problem. To minimize the number of predicted transcripts following the parsimony principle,  
55 we devise an efficient subroutine to reduce an upper bound on the required paths. This subroutine can also  
56 naturally identify false positive edges in the splice graph. All three objectives are unified into a single it-  
57 erative optimization framework, and act together to cause Scallop to possess both high sensitivity (through  
58 fully using the phasing information and minimizing the coverage deviation) and high precision (through  
59 minimizing the number of reconstructed transcripts and removing false positive edges).

60 We compare Scallop with two recent and popular reference-based transcript assemblers, StringTie and  
61 TransComb. We first evaluate them using 10 human RNA-seq samples, all of which use strand-specific  
62 and paired-end protocols (Supplementary Table 2). Among them, ST1, ST2, and ST3 were evaluated in the  
63 StringTie paper, TC1 and TC2 were used in the TransComb paper, while the other five (SC1, SC2, . . . , SC5)  
64 were chosen by us from ENCODE project (<https://genome.ucsc.edu/ENCODE>, 2003–2012). We have tuned  
65 the parameters of Scallop on the first 5 samples (i.e., ST1, ST2, ST3, TC1 and TC2, hereinafter we call them  
66 training samples) and after that we froze Scallop and tested it on other 5 samples (testing samples).

67 For each of the 10 samples, we experiment with three RNA-seq aligners, TopHat2, STAR, and HISAT2,  
68 to map the sequenced reads to the reference genome. Taking the reads alignment as (the only) input, each  
69 method predicts a set of expressed transcripts. (The current version of TransComb does not support HISAT2  
70 alignments, so we only compare StringTie and Scallop when using HISAT2 alignments.) Since we do not  
71 have a ground truth set of expressed transcripts, we evaluate the predicted transcripts by comparing them  
72 with the entire annotation database of known human transcripts, as is commonly done [15, 1, 16, 2]. Usually  
73 for a given sample only a small subset of the transcripts in the database are expressed, and it is also likely  
74 that some predicted transcripts are novel and thus are not in the current database. A multi-exon transcript  
75 is defined as correct if its exon chain can be exactly matched to a known (multi-exon) transcript, while a  
76 single-exon transcript is correct if it overlaps at least 80% with a known single-exon transcript. We use the  
77 `gffcompare` program to determine whether a predicted transcript is correct. Sensitivity is then taken to be  
78 the ratio between the number of correct transcripts and the total number of known transcripts, and precision  
79 is the ratio between the number of correct transcripts and the total number of predicted transcripts.

80 All three methods support specifying a parameter, minimum coverage threshold, to control the minimum  
81 expression abundance of the predicted transcripts. Since highly expressed transcripts are easier to assem-  
82 ble, this parameter essentially balances the sensitivity and precision of the predicted transcripts. In our  
83 experiments, to evaluate the capability of these methods in balancing sensitivity and precision, we run these  
84 methods on 10 different thresholds across a reasonable range: {0, 1, 2.5, 5, 7.5, 10, 25, 50, 75, 100}.

85 The accuracy of these three assemblers using different alignment programs and different minimum coverage  
86 thresholds is shown in Figure 1 (for the 5 testing samples) and Supplementary Figure 1 (for the 5 training  
87 samples). The trade-off between sensitivity and precision of multi-exon transcripts as the minimum cov-  
88 erage threshold is varied is shown in Figure 1A and Supplementary Figure 1A. The curves for Scallop are  
89 highest for all 10 samples and for all three aligners, indicating that no matter the desired sensitivity-precision  
90 trade-off, Scallop outperforms the other two assemblers in reconstructing multi-exon transcripts. Accuracy  
91 is further summarized as the area under the precision-sensitivity curve (AUC), shown in Figure 1B and  
92 Supplementary Figure 1B. With TopHat2 alignments, the average AUC score of Scallop over the 5 testing  
93 samples is 22.0% and 21.8% higher than that of StringTie and TransComb, respectively. With STAR align-  
94 ments, the improvement is 34.1% over StringTie and 106% over TransComb. With HISAT2 alignments,  
95 Scallop's AUC is 23.5% higher than that of StringTie.

96 The default values of the minimum coverage threshold used by StringTie, TransComb and Scallop are  
97 2.5, 0, and 1.0 respectively (circled in Figure 1A and Supplementary Figure 1A). At default parameters,  
98 Scallop is significantly more sensitive than StringTie and TransComb at detecting multi-exon transcripts  
99 (Figure 1C and Supplementary Figure 1C): averaged over the 5 testing samples, Scallop produces between  
100 34.7%–47.0% more correct multi-exon transcripts than StringTie, and between 13.2%–26.0% more than  
101 TransComb, depending on the aligners used. StringTie's higher precision at default parameters can be  
102 explained by its higher default minimum coverage threshold. When evaluated at equivalent sensitivity (Fig-  
103 ure 1A and Supplementary Figure 1A), Scallop obtains higher precision than both StringTie and TransComb.  
104 In particular, Scallop consistently outperforms StringTie and TransComb in terms of both sensitivity and pre-  
105 cision when the minimum coverage threshold is set to 0 (i.e., sensitivity is maximized) for all three methods  
106 (Figure 1D and Supplementary Figure 1D). On average over the 5 testing samples, Scallop predicts 26.2%–  
107 30.9% and 15.5%–28.5% more correct multi-exon transcripts than StringTie and TransComb, depending on  
108 the aligners used. (A comparison of the sets of correct multi-exon transcripts predicted by three methods is

109 given in Supplementary Figure 2.) Further, at minimum coverage equal to 0, the three methods obtain simi-  
 110 lar multi-exon precision when using TopHat2 alignments, while for STAR and HISAT2 alignments Scallop  
 111 obtains a significantly higher precision than both StringTie and TransComb.

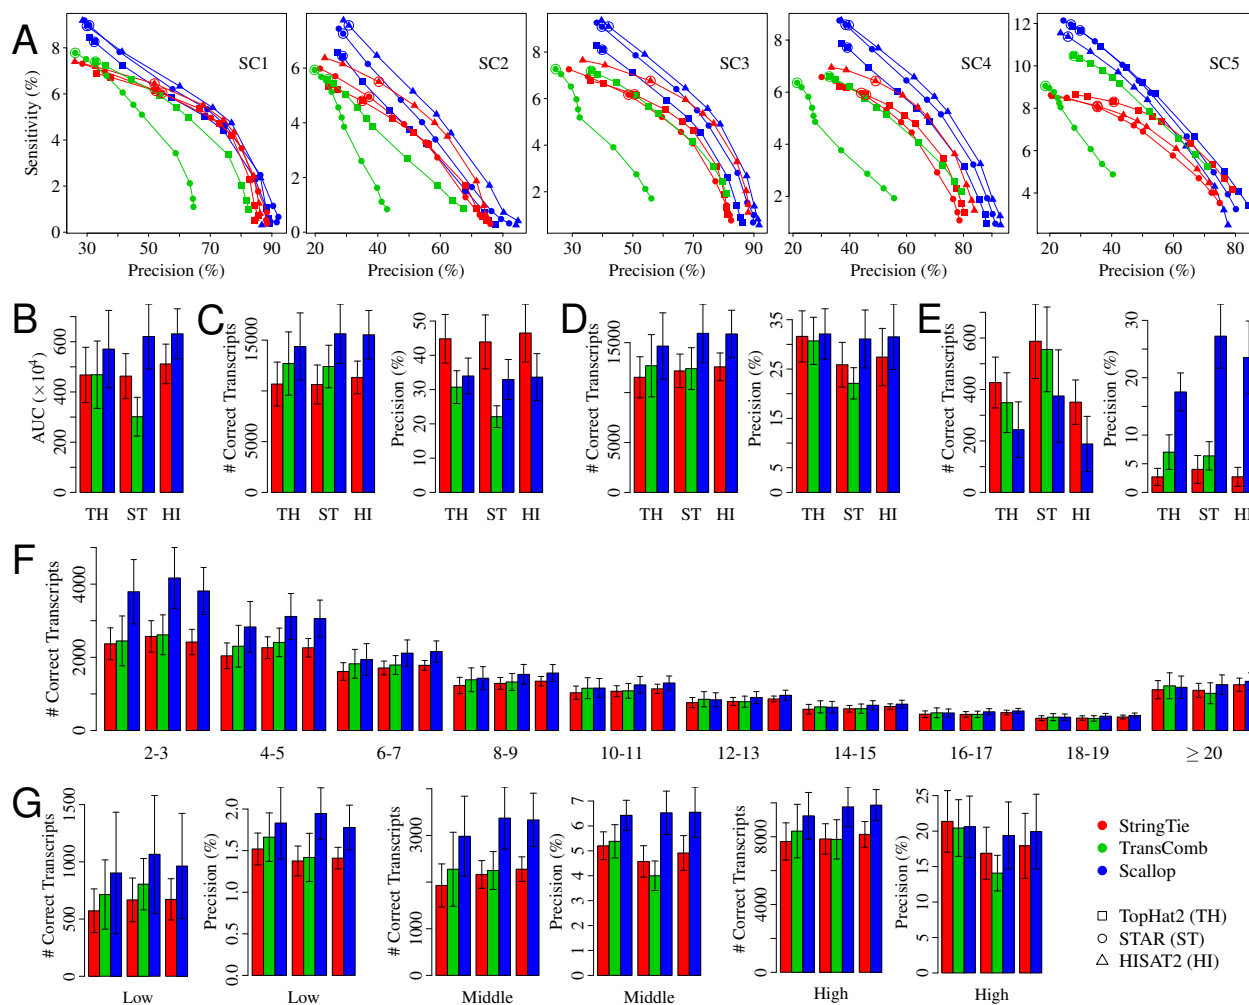

Figure 1: Comparison of the three methods (StringTie, TransComb, and Scallop) over the 5 testing samples. (A) The precision-sensitivity curves for multi-exon transcripts. Each curve connects 10 points, corresponding to the 10 different minimum coverage thresholds  $\{0, 1, 2.5, 5, 7.5, 10, 25, 50, 75, 100\}$ ; the default value of this parameter is circled. (B) The average AUC (area under the precision-sensitivity curve) over the 5 samples. The three groups of bars correspond to TopHat2, STAR, and HISAT2 alignments, respectively (the same for other panels). The error bars show the standard deviation over the 5 samples (the same for other panels). (C) The average sensitivity and precision of multi-exon transcripts for methods running with default parameters. (D) The average sensitivity and precision of multi-exon transcripts for methods running with minimum coverage set to 0. (E) The average sensitivity and precision of single-exon transcripts for methods running with default parameters. (F) The average number of correct transcripts with different number of exons for methods running with minimum coverage set to 0. (G) The average sensitivity and precision of multi-exon transcripts with each subset of transcripts (corresponding to low, middle, and high expression level) as ground truth for methods running with minimum coverage set to 0.

112 StringTie and TransComb obtain higher sensitivity but lower precision than Scallop on single-exon tran-  
113 scripts with default parameters (Figure 1E and Supplementary Figure 1E). However, the overall number of  
114 correct single-exon transcripts obtained by these methods is relatively small compared with that of multi-  
115 exon transcripts (compare scale of Figure 1E with Figure 1C). Scallop aggressively filters short and lowly  
116 expressed single-exon transcripts to make the precision of single-exon transcripts comparable to that of  
117 multi-exon transcripts.

118 We further compare the number of correct transcripts with different numbers of exons when their sensitivity  
119 is maximized (i.e., the minimum coverage threshold is 0). The results are shown in Figure 1F and Sup-  
120 plementary Figure 1F. While Scallop is able to identify more correct transcripts for genes with at least up  
121 to 17 exons, its advantage is most pronounced on transcripts with 2–7 exons. For example, with TopHat2  
122 alignments, on average over the testing samples, Scallop obtains 60.0% and 54.9% more correct transcripts  
123 with 2 or 3 exons than StringTie and TransComb, respectively.

124 Scallop also significantly improves identification of lowly expressed transcripts. To perform a quantitative  
125 measurement, we use Salmon [31] to quantify the 10 RNA-seq samples using human annotation database  
126 (ENSEMBL release 87) as reference. For each sample, we collect all multi-exon transcripts with expression  
127 abundance larger than a threshold ( $\text{TPM} \geq 0.1$ ), sort them according to their expression abundances, and  
128 divide them into three equal subsets corresponding to low, middle and high expression levels. We then  
129 compute the accuracy of the three methods on multi-exon transcripts with each subset as the ground truth  
130 (Figure 1G and Supplementary Figure 1G). Scallop achieves higher accuracy on all three expression levels,  
131 but the advantage is much more significant for low and middle levels. For example, with STAR alignment,  
132 on average over the 5 testing samples, Scallop obtains 59.6%, 55.8%, and 24.1% more correct multi-exon  
133 transcripts than StringTie for low, middle, and high expression levels, respectively.

134 To show the generality of the above results, we collected all human RNA-seq paired-end samples from  
135 the ENCODE project (<https://www.encodeproject.org>, 2013–present) that provide pre-computed read align-  
136 ments (for experiments with more than one such sample, we arbitrarily select one). This yielded 50 strand-  
137 specific and 15 non-strand-specific samples. Since the three methods use different parameters to balance  
138 precision and sensitivity, to compare them on equal footing, we compute an adjusted sensitivity and ad-  
139 justed precision. Specifically, for each sample, we fix the precision  $\phi$  of the method with highest precision,

140 and for each of the other two methods with smaller precision, we discard its predicted transcripts from the  
141 lowest coverage until the precision equals  $\phi$ ; the adjusted sensitivity is the sensitivity at this precision  $\phi$ .  
142 We compute the adjusted precision analogously, filtering low-coverage transcripts of the two methods with  
143 higher sensitivity until all methods have the same sensitivity.

144 Scallop shows higher adjusted sensitivity and adjusted precision than both StringTie and TransComb on  
145 nearly all samples when using default parameters (Supplementary Figure 3 and Supplementary Figure 4).  
146 On average over these 50 strand-specific samples, Scallop obtains 17.4% and 19.3% more correct multi-  
147 exon transcripts (after adjustment to identical precision) than StringTie and TransComb, respectively. The  
148 average adjusted precision are 39.1%, 38.6%, and 47.3% for StringTie, TransComb, and Scallop, respec-  
149 tively. On average over the 15 non-strand-specific samples, Scallop obtains 14.6% more correct multi-exon  
150 transcripts (after adjustment) than StringTie and obtains an average adjusted precision of 48.0%, while that  
151 of StringTie is 42.0%. (TransComb fails on all 15 non-strand-specific samples.) Scallop's advantage is even  
152 more pronounced when lowly expressed transcripts are included by setting the minimum coverage to 0 for  
153 all three methods (Supplementary Figure 5 and Supplementary Figure 6). This provides additional evidence  
154 that Scallop is particularly more sensitive to lowly expressed transcripts.

155 Scallop has a comparable but slightly longer running time than StringTie, while TransComb takes signif-  
156 icantly longer (Supplementary Figure 7). On average over the 10 samples and the 10 minimum coverage  
157 thresholds, with TopHat2 alignments, the running times of Scallop and TransComb are  $1.08\times$  and  $3.78\times$  that  
158 of StringTie. With STAR alignments, Scallop and TransComb take  $1.34\times$  and  $5.42\times$  longer than StringTie,  
159 respectively. With HISAT2 alignments, Scallop takes  $1.25\times$  longer than StringTie.

160 Scallop presents a new technique for estimating transcriptome assembly from RNA-seq. While building  
161 upon the standard paradigm of the splice graph, it uses a novel algorithm to decompose the graph through  
162 optimizing several competing objectives. This leads it to achieve both higher sensitivity and higher preci-  
163 sion over a wide range of minimum coverage thresholds. In particular, Scallop can theoretically guarantee  
164 to fully use the phasing information to resolve complicated alternative splicing variants, causing signifi-  
165 cant improvement on assembling multi-exon transcripts and lowly expressed transcripts. Scallop is freely  
166 available as open source at <http://www.github.com/Kingsford-Group/scallop>.



167 **Acknowledgements** This research is funded in part by the Gordon and Betty Moore Foundations Data-  
168 Driven Discovery Initiative through Grant GBMF4554 to C.K., by the US National Science Foundation  
169 (CCF-1256087, CCF-1319998) and by the US National Institutes of Health (R01HG007104).

## 170 Reference

- 171 [1] M. Pertea, G.M. Pertea, C.M. Antonescu, T.-C. Chang, J.T. Mendell, and S.L. Salzberg. StringTie  
172 enables improved reconstruction of a transcriptome from RNA-seq reads. *Nat. Biotechnol.*, 33(3):  
173 290–295, 2015.
- 174 [2] J. Liu, T. Yu, T. Jiang, and G. Li. TransComb: genome-guided transcriptome assembly via combing  
175 junctions in splicing graphs. *Genome Biol.*, 17(1):213, 2016.
- 176 [3] Z. Wang, M. Gerstein, and M. Snyder. RNA-Seq: a revolutionary tool for transcriptomics. *Nat. Rev.*  
177 *Genet.*, 10(1):57–63, 2009.
- 178 [4] N.L. Barbosa-Morais, M. Irimia, Q. Pan, H.Y. Xiong, S. Gueroussov, L.J. Lee, et al. The evolutionary  
179 landscape of alternative splicing in vertebrate species. *Science*, 338(6114):1587–1593, 2012.
- 180 [5] J.K. Pickrell, J.C. Marioni, A.A. Pai, J.F. Degner, B.E. Engelhardt, E. Nkadori, J.-B. Veyrieras,  
181 M. Stephens, Y. Gilad, and J.K. Pritchard. Understanding mechanisms underlying human gene ex-  
182 pression variation with RNA sequencing. *Nature*, 464(7289):768–772, 2010.
- 183 [6] C. Trapnell, B.A. Williams, G. Pertea, A. Mortazavi, G. Kwan, M.J. Van Baren, S.L. Salzberg, B.J.  
184 Wold, and L. Pachter. Transcript assembly and quantification by RNA-Seq reveals unannotated tran-  
185 scripts and isoform switching during cell differentiation. *Nat. Biotechnol.*, 28(5):511–515, 2010.
- 186 [7] M. Guttman, M. Garber, J.Z. Levin, J. Donaghey, J. Robinson, X. Adiconis, L. Fan, et al. Ab initio re-  
187 construction of cell type-specific transcriptomes in mouse reveals the conserved multi-exonic structure  
188 of lincrnas. *Nat. Biotechnol.*, 28(5):503–510, 2010.
- 189 [8] W. Li, J. Feng, and T. Jiang. IsoLasso: a LASSO regression approach to RNA-Seq based transcriptome  
190 assembly. *J. Comput. Biol.*, 18(11):1693–1707, 2011.
- 191 [9] J.J. Li, C.-R. Jiang, J.B. Brown, H. Huang, and P.J. Bickel. Sparse linear modeling of next-generation



- 192 mRNA sequencing (RNA-Seq) data for isoform discovery and abundance estimation. *Proc. Natl. Acad.*  
193 *Sci. USA*, 108(50):19867–19872, 2011.
- 194 [10] Y.-Y. Lin, P. Dao, F. Hach, M. Bakhshi, F. Mo, A. Lapuk, C. Collins, and S.C. Sahinalp. CLIQ:  
195 Accurate comparative detection and quantification of expressed isoforms in a population. In *Proc.*  
196 *12th Workshop Algs. in Bioinf. (WABI'12)*, volume 7534 of *Lecture Notes in Comp. Sci.*, pages 178–  
197 189, 2012.
- 198 [11] W. Li and T. Jiang. Transcriptome assembly and isoform expression level estimation from biased  
199 RNA-Seq reads. *Bioinformatics*, 28(22):2914–2921, 2012.
- 200 [12] J. Behr, A. Kahles, Y. Zhong, V.T. Sreedharan, P. Drewe, and G. Rättsch. MITIE: Simultaneous RNA-  
201 Seq-based transcript identification and quantification in multiple samples. *Bioinformatics*, 29(20):  
202 2529–2538, 2013.
- 203 [13] A.M. Mezlini, E.J.M. Smith, M. Fiume, O. Buske, G.L. Savich, et al. iReckon: Simultaneous isoform  
204 discovery and abundance estimation from RNA-seq data. *Genome Res.*, 23(3):519–529, 2013.
- 205 [14] A.I. Tomescu, A. Kuosmanen, R. Rizzi, and V. Mäkinen. A novel min-cost flow method for estimating  
206 transcript expression with RNA-Seq. *BMC Bioinformatics*, 14(5):1, 2013.
- 207 [15] L. Maretty, J.A. Sibbesen, and A. Krogh. Bayesian transcriptome assembly. *Genome Biol.*, 15(10):1,  
208 2014.
- 209 [16] S. Canzar, S. Andreotti, D. Weese, K. Reinert, and G.W. Klau. CIDANE: comprehensive isoform  
210 discovery and abundance estimation. *Genome Biol.*, 17(1):16, 2016.
- 211 [17] D. Kim, G. Pertea, C. Trapnell, H. Pimentel, R. Kelley, S.L. Salzberg, et al. TopHat2: accurate  
212 alignment of transcriptomes in the presence of insertions, deletions and gene fusions. *Genome Biol.*,  
213 14(4):R36, 2013.
- 214 [18] K.F. Au, H. Jiang, L. Lin, Y. Xing, and W.H. Wong. Detection of splice junctions from paired-end  
215 RNA-seq data by SpliceMap. *Nucleic Acids Res.*, 38(14):4570–4578, 2010.
- 216 [19] A. Dobin, C.A. Davis, F. Schlesinger, J. Drenkow, C. Zaleski, S. Jha, P. Batut, M. Chaisson, and T.R.  
217 Gingeras. STAR: ultrafast universal RNA-seq aligner. *Bioinformatics*, 29(1):15–21, 2013.

- 218 [20] D. Kim, B. Langmead, and S.L. Salzberg. HISAT: a fast spliced aligner with low memory require-  
219        ments. *Nat. Methods*, 12(4):357–360, 2015.
- 220 [21] J. Liu, G. Li, Z. Chang, T. Yu, B. Liu, R. McMullen, P. Chen, and X. Huang. BinPacker: Packing-based  
221        de novo transcriptome assembly from RNA-seq data. *PLoS Comput. Biol.*, 12(2):e1004772, 2016.
- 222 [22] G. Robertson, J. Schein, R. Chiu, R. Corbett, M. Field, S.D. Jackman, K. Mungall, S. Lee, H.M. Okada,  
223        J.Q. Qian, et al. De novo assembly and analysis of RNA-seq data. *Nat. Methods*, 7(11):909–912, 2010.
- 224 [23] J. Martin, V.M. Bruno, Z. Fang, X. Meng, M. Blow, T. Zhang, G. Sherlock, M. Snyder, and Z. Wang.  
225        Rnnotator: an automated de novo transcriptome assembly pipeline from stranded RNA-Seq reads.  
226        *BMC Genomics*, 11(1):1, 2010.
- 227 [24] M.G. Grabherr, B.J. Haas, M. Yassour, J.Z. Levin, D.A. Thompson, et al. Trinity: reconstructing a  
228        full-length transcriptome without a genome from RNA-Seq data. *Nat. Biotechnol.*, 29(7):644, 2011.
- 229 [25] Y. Xie, G. Wu, J. Tang, R. Luo, J. Patterson, S. Liu, et al. SOAPdenovo-Trans: de novo transcriptome  
230        assembly with short RNA-Seq reads. *Bioinformatics*, 30(12):1660–1666, 2014.
- 231 [26] D.R. Zerbino and E. Birney. Velvet: algorithms for de novo short read assembly using de Bruijn  
232        graphs. *Genome Res.*, 18(5):821–829, 2008.
- 233 [27] M.H. Schulz, D.R. Zerbino, M. Vingron, and E. Birney. Oases: robust de novo RNA-seq assembly  
234        across the dynamic range of expression levels. *Bioinformatics*, 28(8):1086–1092, 2012.
- 235 [28] Y. Peng, H.C.M. Leung, S.-M. Yiu, M.-J. Lv, X.-G. Zhu, and F.Y.L. Chin. IDBA-tran: a more robust  
236        de novo de Bruijn graph assembler for transcriptomes with uneven expression levels. *Bioinformatics*,  
237        29(13):i326–i334, 2013.
- 238 [29] T. Steijger, J.F. Abril, P.G. Engström, F. Kokocinski, T.J. Hubbard, et al. Assessment of transcript  
239        reconstruction methods for RNA-seq. *Nat. Methods*, 10(12):1177–1184, 2013.
- 240 [30] K.E. Hayer, A. Pizarro, N.F. Lahens, J.B. Hogenesch, and G.R. Grant. Benchmark analysis of algo-  
241        rithms for determining and quantifying full-length mRNA splice forms from RNA-seq data. *Bioinform-*  
242        *atics*, 31(24):3938–3945, 2015.

243 [31] R. Patro, G. Duggal, M.I. Love, R.A. Irizarry, and C. Kingsford. Salmon provides fast and bias-aware  
244 quantification of transcript expression. *Nat. Methods*, 2017. doi: 10.1038/nmeth.4197.

## 245 Online Methods

### 246 Problem Statement

247 Based on a given alignment of sequencing reads to a reference genome, we build the splice graph, denoted  
 248 as  $G = (V, E)$ , as follows. We first extract splice positions from the alignments. These splice positions imply  
 249 the boundaries of exons (or partial exons) and introns of the reference genome. For each inferred exon,  
 250 we add a vertex  $v$  to  $V$ . If there exist reads spanning two exons  $u$  and  $v$  (where  $u$  occurs before  $v$  in the  
 251 genome), we add a directed edge  $e = (u, v)$  to  $E$ , and set the weight of  $e$ , denoted as  $w(e)$ , to the number of  
 252 such reads that span  $u$  and  $v$ . We also add a source vertex  $s$ , and for each vertex  $u \in V \setminus \{s\}$  with in-degree  
 253 of 0, we add a directed edge  $(s, u)$  with weight  $w(s, u) = \sum_{(u, v) \in E} w(u, v)$ . Similarly, we add a sink vertex  
 254  $t$ , and for each vertex  $v \in V \setminus \{s, t\}$  with out-degree of 0, we add a directed edge  $(v, t)$  to  $E$  with weight  
 255  $w(v, t) = \sum_{(u, v) \in E} w(u, v)$ . See Figure 2 for an example.

256 Many reads (including paired mates) can span more than two exons, providing phasing information to recon-  
 257 struct the expressed transcripts. We collect such phasing information as a set of phasing paths of  $G$ , denoted  
 258 as  $H$ , as follows. If a read spans vertices  $v_{i_1}, v_{i_2}, \dots, v_{i_m}$  of  $G$  (i.e., this read sequentially aligns to these corre-  
 259 sponding exons),  $m \geq 3$ , we then add a phasing path  $(v_{i_1}, v_{i_2}, \dots, v_{i_m})$  to  $H$ . For the case of paired-end reads,  
 260 if we have that one read span vertices  $v_{i_1}, v_{i_2}, \dots, v_{i_m}$ , and its mate read spans vertices  $v_{j_1}, v_{j_2}, \dots, v_{j_n}$ , and  
 261 there exists a unique path  $(v_{i_m}, v_{k_1}, v_{k_2}, \dots, v_{k_l}, v_{j_1})$  from  $v_{i_m}$  to  $v_{j_1}$  in  $G$ , and that  $m + n + l \geq 3$ , we then add  
 262 a phasing path  $(v_{i_1}, \dots, v_{i_m}, v_{k_1}, \dots, v_{k_l}, v_{j_1}, \dots, v_{j_n})$  to  $H$ . In the following, we shall equivalently represent  
 263 each phasing path with  $k$  vertices as a consecutive list of  $(k - 1)$  edges. Different reads or paired-end reads

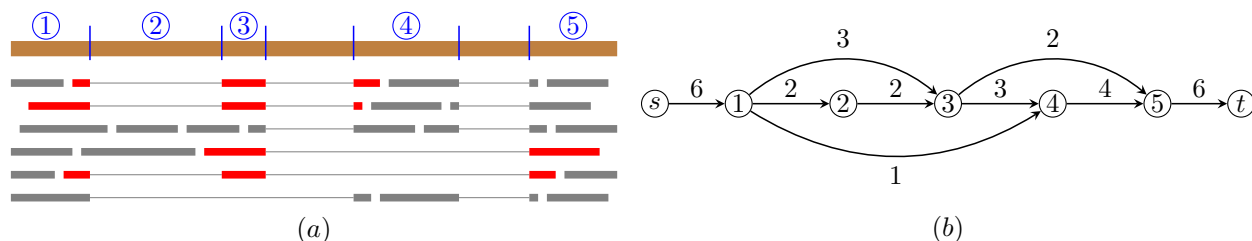

Figure 2: Example of building splice graph and phasing paths. **(a)** Alignment of reads to the reference genome. Inferred (partial) exons are marked with blue numbers. Reads that span more than two exons are marked red, from which we can get the set of phasing paths as  $\{(1, 3, 4), (2, 3, 5), (1, 3, 5)\}$ . The abundance of these phasing paths are  $g(1, 3, 4) = 2$ ,  $g(2, 3, 5) = 1$ , and  $g(1, 3, 5) = 1$ . **(b)** The corresponding splice graph and weights for all edges.

264 might produce the same phasing path. For each phasing path  $h \in H$ , we use  $g(h)$  to record the number of  
265 such reads or paired-end reads that produce  $h$ .

266 Based on  $G$ ,  $w$  and  $H$ , we compute a set  $P$  of  $s$ - $t$  paths of  $G$  and associate a real-value  $f(p)$  for every path  
267  $p \in P$ . Each path  $p \in P$  implies an expressed transcript, and  $f(p)$  estimates the expression abundance of  
268 the corresponding transcript. We now design three objectives to guide reconstructing  $P$  and  $f$ . First, since  
269 each phasing path is constructed from a single read or paired-end reads, which must be sampled from a  
270 single transcript, we expect that each phasing path appears as a whole in some reconstructed transcript.  
271 Formally, we say a phasing path  $h \in H$  is covered by  $P$ , if there exists an  $s$ - $t$  path  $p \in P$  such that  $h$  is a  
272 consecutive subset of edges of  $p$ . We do not enforce that all phasing paths in  $H$  must be covered by  $P$ . This  
273 is because there exist false positive edges in the splice graph due to alignment errors or sequencing errors.  
274 Our algorithm will try to identify and remove these false positive edges. Except these phasing paths with  
275 false positive edges, we do require that all other phasing paths in  $H$  are covered by  $P$ . Second, for each edge  
276  $e \in E$  we expect that the superposition of the abundances of the inferred  $s$ - $t$  paths passing through  $e$ , i.e.,  
277  $\sum_{p \in P: e \in p} f(p)$ , is as close to its observed read coverage  $w(e)$  as possible. Therefore, the second objective is  
278 to minimize the deviation between these two quantities, defined as

$$d(P, f, w) := \sum_{e \in E} |w(e) - \sum_{p \in P: e \in p} f(p)|.$$

279 Third, following the principle of parsimony, we expect to use a smaller set of  $s$ - $t$  paths to explain  $G$ ,  $w$  and  
280  $H$ . That is, the third objective is to minimize  $|P|$ .

281 Combining all the three objectives, we informally describe the task of transcript assembly as follows.

282 **Problem 1 (Transcript Assembly)** *Given  $G$ ,  $w$  and  $H$ , compute a set of  $s$ - $t$  paths  $P$  of  $G$  and abundance*  
283  *$f(p)$  for each  $p \in P$ , such that  $P$  covers all phasing paths in  $H$  (except those with false positive edges), and*  
284 *that both  $d(P, f, w)$  and  $|P|$  are as small as possible.*

## 285 **Algorithm**

286 Our algorithm employs an iterative strategy to gradually decompose the splice graph into  $s$ - $t$  paths while  
287 achieving the three objectives above. Specifically, we divide all vertices into three types based on the

288 influence of the phasing paths on each vertex, and design different subroutines to decompose each type of  
289 vertices. In each iteration, our algorithm decomposes a single vertex so as to either locally minimize the  
290 deviation  $d(P, f, w)$ , or minimize the number of reconstructed paths  $|P|$ , while preserving all phasing paths  
291 in  $H$ . Our algorithm can guarantee that, except the phasing paths containing false positive edges, all other  
292 phasing paths can be covered by the final set of  $s$ - $t$  paths. This property is achieved by enforcing all three  
293 subroutines to keep the invariant that after each iteration every phasing path can be covered by some  $s$ - $t$  in  
294 the current splice graph.

295 We say a vertex  $v \in V \setminus \{s, t\}$  is trivial, if its in-degree is 1, or its out-degree is 1; otherwise we say  $v$  is  
296 nontrivial. Intuitively, there is a unique way to decompose a trivial vertex, while there might be multiple  
297 ways to decompose a nontrivial vertex. For those nontrivial vertices, we introduce a data structure to further  
298 classify them into two types based on the influence of phasing paths on them. For any nontrivial vertex  
299  $v$ , we build a bipartite graph  $G_v = (S_v \cup T_v, E_v)$ , in which its vertices ( $S_v \cup T_v$ ) correspond to edges in  $G$ ,  
300 while its edges ( $E_v$ ) describe whether the corresponding two edges in  $G$  are connected by some phasing path  
301 in  $H$ . Formally, let  $S_v$  be the set of edges that point to  $v$ , and let  $T_v$  be the set of edges that leave  $v$ , i.e.,  
302  $S_v = \{e \in E \mid e = (u, v)\}$  and  $T_v = \{e \in E \mid e = (v, w)\}$ . For each pair of edges  $e \in S_v$  and  $e' \in T_v$ , we add  
303 an edge  $(e, e')$  to  $E_v$  if there exists a phasing path  $h \in H$  such that  $(e, e')$  is a consecutive pair in  $h$ . We say  
304 a nontrivial vertex  $v$  is unsplittable if all elements of  $S_v$ , or all elements of  $T_v$ , are in the same connected  
305 component of  $G_v$  (Figure 3(a,b)); otherwise we say  $v$  is splittable (Figure 5(a,b)). In the following, we  
306 design different subroutines to decompose unsplittable vertices, splittable vertices, and trivial vertices.

307 **Decomposing Unsplittable Vertices.** We now describe the subroutine to decompose an unsplittable vertex  
308  $v$  (Figure 3). The aim of this subroutine is to replace  $v$  as a set of trivial vertices so as to locally minimize  
309  $d(P, f, w)$  and also preserve all phasing paths.

310 The first step is to balance  $v$  by computing new weights  $\bar{w}(\cdot)$  for adjacent edges of  $v$  (i.e.,  $S_v \cup T_v$ ). Specif-  
311 ically, for any subset  $E_1 \subset E$  we define  $w(E_1) := \sum_{e \in E_1} w(e)$ . Let  $r_v := \sqrt{w(S_v)/w(T_v)}$ . Then we set  
312  $\bar{w}(e) := w(e)/r_v$  for any edge  $e \in S_v$ , and set  $\bar{w}(e) := w(e) \cdot r_v$  for any edge  $e \in T_v$ . Similarly, we define  
313  $\bar{w}(E_1) := \sum_{e \in E_1} \bar{w}(e)$  for any subset  $E_1 \subset E$ . Clearly, we have that  $\bar{w}(S_v) = \bar{w}(T_v)$ , i.e., after balancing the  
314 sum of weights of all in-edges of  $v$  equals that of all out-edges of  $v$ .

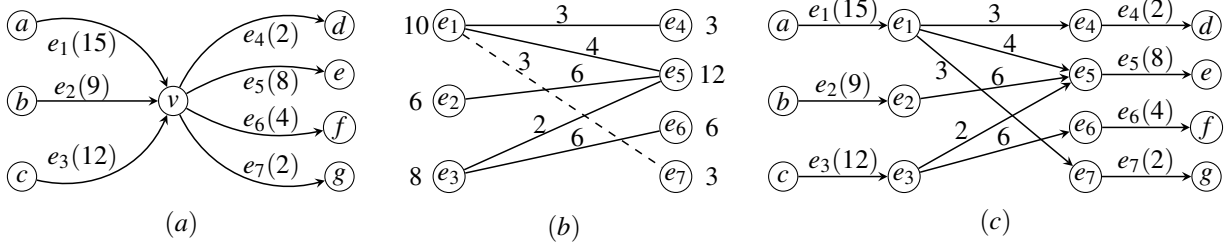

Figure 3: Example of decomposing an unsplittable vertex. **(a)** Subgraph associated with vertex  $v$ . The weight of each edge is shown in the parenthesis. Assume that phasing paths contain  $(e_1, e_4)$ ,  $(e_1, e_5)$ ,  $(e_2, e_5)$ ,  $(e_3, e_5)$  and  $(e_3, e_6)$ . **(b)** Bipartite graph  $G_v$  (without the dashed edge), and the extended bipartite graph  $\overline{G}_v$  (with the dashed edge). The balanced weights are next to the vertices. The weights given by the optimal solution of the linear programming are next to edges. **(c)** Updated subgraph after decomposing  $v$ .

315 The second step of the subroutine is to build the extended bipartite graph  $\overline{G}_v = (S_v \cup T_v, \overline{E}_v)$ . The goal of  
 316 this extension is to connect edges with no phasing paths to the most likely preceding or succeeding edge.  
 317 Specifically, let  $e_s := \arg \max_{e \in S_v} \overline{w}(e)$  and  $e_t := \arg \max_{e \in T_v} \overline{w}(e)$  be the edges that have the largest balanced  
 318 weights in  $S_v$  and  $T_v$ , respectively. Let  $S_v^0 \subset S_v$  and  $T_v^0 \subset T_v$  be the set of edges that have total degree of 0 in  
 319  $G_v$ . We then set  $\overline{E}_v := E_v \cup \{(e, e_t) \mid e \in S_v^0\} \cup \{(e_s, e) \mid e \in T_v^0\}$ . See Figure 3**(b)** for an example.

320 The third step of the subroutine is to assign weights for all edges  $(\overline{E}_v)$  in the extended bipartite graph  $\overline{G}_v$   
 321 so as to locally minimize the deviation *w.r.t.*  $\overline{w}(\cdot)$ , i.e.,  $d(P, f, w)$ . We formulate it as a linear programming  
 322 problem. For each edge  $(e, e') \in \overline{E}_v$  (recall that each edge in  $\overline{G}_v$  corresponds to a pair of edges in the splice  
 323 graph  $G$ ), we have a variable  $x_{e, e'}$  to indicate the desired weight of edge  $(e, e')$ . For each vertex  $e \in S_v \cup T_v$   
 324 (recall that each vertex in  $\overline{G}_v$  corresponds to an edge in  $G$ ) we add a variable  $y_e$  to indicate the deviation  
 325 between its balanced weight  $\overline{w}(e)$  and the sum of the weights of all edges that are adjacent to vertex  $e$  in  $\overline{G}_v$ .  
 326 Formally, we have the following constraints:

$$\begin{aligned} \left| \overline{w}(e) - \sum_{e' \in T_v: (e, e') \in \overline{E}_v} x_{e, e'} \right| &\leq y_e, \quad \forall e \in S_v; \\ \left| \overline{w}(e') - \sum_{e \in S_v: (e, e') \in \overline{E}_v} x_{e, e'} \right| &\leq y_{e'}, \quad \forall e' \in T_v. \end{aligned}$$

327 The objective function of the linear programming instance is taken to be:

$$\text{minimize } \sum_{e \in S_v} y_e + \sum_{e' \in T_v} y_{e'}.$$

328 In most cases, when  $\overline{G}_v$  is not a tree, i.e., it contains a cycle (see Figure 4), the above linear programming has



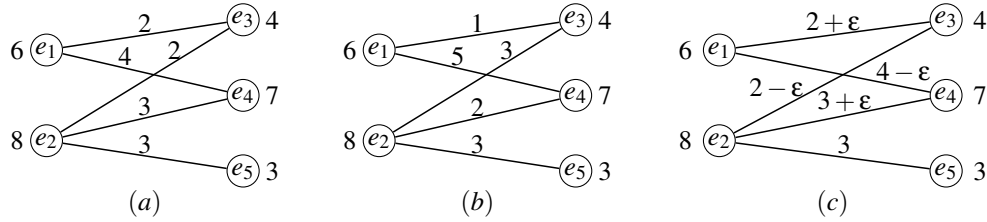

Figure 4: Example with multiple optimal solutions when the extended bipartite graph contains cycles. The balanced weights, i.e.,  $\bar{w}(\cdot)$ , are next to the vertices. **(a, b)** Two optimal solutions with deviation of 0 *w.r.t.*  $\bar{w}(\cdot)$ . **(c)** When  $-2 < \varepsilon < 2$ , the solution is always optimal.

329 multiple optimal solutions. We use the abundance information of the phasing paths stored in  $g(\cdot)$  to reassign  
 330 weights while keeping the optimal deviation *w.r.t.*  $\bar{w}(\cdot)$ . For each edge  $(e, e') \in \bar{E}_v$ , we denote by  $g(e, e')$   
 331 the number of reads or paired-end reads that continuously go through  $e$  and  $e'$ , which can be computed as  
 332  $g(e, e') = \sum_{h \in H: h \text{ contains } (e, e')} g(h)$ . Our goal is then to reassign the weights for edges in  $\bar{G}_v$  so as to keep the  
 333 above minimal deviation *w.r.t.*  $\bar{w}(\cdot)$  but to minimize the deviation *w.r.t.*  $g(\cdot, \cdot)$ .

334 We formulate this problem as another linear programming instance. Specifically, let  $y_e^*$  and  $y_{e'}^*$ ,  $e \in S_v$  and  
 335  $e' \in T_v$ , be the optimal solution of first linear programming instance (thus  $y_e^*$  and  $y_{e'}^*$  are constants rather than  
 336 variables in the second linear programming problem). Similar to the first linear programming problem, we  
 337 use variables  $x_{e, e'}$  to indicate the weight of edge  $(e, e')$  in  $\bar{G}_v$ . We use the following constraints to guarantee  
 338 that the optimal weights have the same deviation *w.r.t.*  $\bar{w}(\cdot)$  as the first linear programming solution:

$$\begin{cases} \left| \bar{w}(e) - \sum_{e' \in T_v: (e, e') \in \bar{E}_v} x_{e, e'} \right| = y_e^*, & \forall e \in S_v; \\ \left| \bar{w}(e') - \sum_{e \in S_v: (e, e') \in \bar{E}_v} x_{e, e'} \right| = y_{e'}^*, & \forall e' \in T_v. \end{cases}$$

339 The objective function of this linear programming instance is then taken to minimize the sum of the deviation  
 340 of weights *w.r.t.*  $g(\cdot, \cdot)$ :

$$\text{minimize } \sum_{(e, e') \in \bar{E}_v} |g(e, e') - x_{e, e'}|.$$

341 We assign the weights for edges in  $\bar{E}_v$  to be the optimal value of  $x_{e, e'}$  of the second linear program. Note  
 342 that if the first linear program has the unique optimal solution, then both linear programs will have the same  
 343 optimal solution.

344 Finally, we update splice graph  $G$  by replacing  $v$  with  $\bar{G}_v$  (see Figure 3(c)); we denote by  $G'$  the updated  
 345 splice graph. For the edges in  $\bar{G}_v$  that added to  $G'$ , we maintain the information that they are artificially

346 added edges and thus do not correspond to any edge in  $G$ . This information will be used after decomposing  
 347 all vertices to backtrack the paths with respect to the original splice graph (see line 6 of Algorithm 1). For  
 348 example, if  $(e_1, e_2) \in \overline{E}_v$ , then the path  $(\dots, e_1, (e_1, e_2), e_2, \dots)$  in  $G'$  corresponds to the path  $(\dots, e_1, e_2, \dots)$   
 349 in  $G$ . We then update  $H$ ; we denote by  $H'$  the updated set of phasing paths. For any phasing path  $h \in H$ , if  
 350  $h$  contains a pair of continuous edges  $e$  and  $e'$  in  $G$  such that  $(e, e') \in \overline{E}_v$ , i.e.,  $h = (\dots, e, e', \dots)$ , then  $h$  will  
 351 become  $h' = (\dots, e, (e, e'), e', \dots) \in H'$ .

352 This subroutine preserves all phasing paths in  $H$ , i.e., every phasing path  $h \in H$  is still covered by some  
 353  $s$ - $t$  path  $p'$  of  $G'$  (i.e, if we transform  $p'$  of  $G'$  into the corresponding path  $p$  of  $G$  through removing the  
 354 artificially added edges in  $p'$  (if any), then  $p$  covers  $h$ ). This is true because according to our construction of  
 355  $G'$  and  $H'$  there is a one-to-one correspondence between  $H$  and  $H'$  and every phasing path in  $H'$  is covered  
 356 by some path in  $G'$ .

357 To choose which unsplittable vertex  $v$  to apply the above transformation to, we define

$$z(v) := \left( \sum_{e \in S_v} \sqrt{y_e^*} + \sum_{e' \in T_v} \sqrt{y_{e'}^*} \right) / (\overline{w}(S_v) + \overline{w}(T_v)),$$

358 and select a vertex  $v$  that minimizes  $z(v)$  to decompose (see line 3 of Algorithm 1).

359 **Decomposing Splittable Vertices.** We now describe the subroutine to decompose a splittable vertex  $v$   
 360 (Figure 5). The aim of this subroutine is to reduce  $|P|$  while preserving all phasing paths. Since  $P$  is not  
 361 explicitly available until we have finished decomposing all vertices, we use  $U := |E| - |V| + 2$  to approximate  
 362  $|P|$ . It has been proved that  $U$  is an upper bound of  $|P|$  in the flow decomposition scenario: for a given flow  
 363 at most  $U$  paths are required to decompose this flow [32, 33]. Following this approximation, in order to  
 364 reduce  $|P|$ , our subroutine to decompose a splittable  $v$  will increase the number of vertices or decrease the  
 365 number of edges, while at the same time preserving all phasing paths. Splittable vertices will typically be  
 366 replaced by two new vertices.

367 The first step of this subroutine is also to balance  $v$  by computing  $\overline{w}(\cdot)$  for edges in  $S_v \cup T_v$  following the  
 368 same procedure as in decomposing unsplittable vertices. The second step is to split  $v$  into two vertices so as  
 369 to keep all phasing paths and to minimize the balanced weight discrepancy (i.e., to make each of the two new  
 370 vertices as balanced as possible). Formally, we seek  $S'_v \subset S_v$  and  $T'_v \subset T_v$ ,  $S'_v \cup T'_v \neq \emptyset$  and  $S'_v \cup T'_v \neq S_v \cup T_v$ ,

371 such that for each  $(e, e') \in E_v$ , either  $e \in S'_v$  and  $e' \in T'_v$ , or  $e \notin S'_v$  and  $e' \notin T'_v$ , and that  $|\bar{w}(S'_v) - \bar{w}(T'_v)|$  is  
 372 minimized. Intuitively, this formulation forces that two edges in some phasing path must be adjacent after  
 373 splitting, and thus all phasing paths can be preserved.

374 The above problem can be equivalently transformed into the subset-sum problem. Let  $\mathcal{C}$  be the set of all  
 375 connected components of  $G_v$ . We define  $r(C) := \sum_{e \in S_v: e \in C} \bar{w}(e) - \sum_{e' \in T_v: e' \in C} \bar{w}(e')$ , for any  $C \in \mathcal{C}$ . Then the  
 376 above problem is equivalent to computing a nonempty and strict subset of  $\{r(C) \mid C \in \mathcal{C}\}$  such that the sum  
 377 of all elements of this subset is closest to 0. In our implementation, we use the existing pseudo-polynomial  
 378 time dynamic programming algorithm to solve it.

379 Let  $S_v^{'*}$  and  $T_v^{'*}$  be the optimal subsets returned by the above algorithm. We then update splice graph  $G$   
 380 through performing the following procedure to decompose  $v$ . We denote the updated splice graph as  $G'$  (see  
 381 Figure 5). Vertex  $v$  will be split into two vertices by adding another vertex  $v'$  to  $G'$ . Edges in  $S_v^{'*} \cup T_v^{'*}$  will  
 382 be detached from  $v$  and attached to  $v'$ . Notice that the weights for edges in  $S_v \cup T_v$  are kept unchanged as  
 383  $w(\cdot)$ , i.e., the balanced weight  $\bar{w}(\cdot)$  is only used to compute  $S_v^{'*}$  and  $T_v^{'*}$ .

384 It could be the case that  $|S_v^{'*} \cup T_v^{'*}| = 1$  (or symmetrically,  $|(S_v \setminus S_v^{'*}) \cup (T_v \setminus T_v^{'*})| = 1$ ), i.e., the new vertex  $v'$   
 385 will have either in-degree of 0 and out-degree of 1, or out-degree of 0 and in-degree of 1. In this case, the  
 386 above procedure of decomposing  $v$  will degenerate into removing this edge from  $G$ , instead of splitting  $v$   
 387 into two vertices. If this is the case, it indicates that this particular edge is more likely to be a false positive  
 388 edge. In other words, this procedure can be used to naturally remove false positive edges in the splice graph.  
 389 For this case, we remove the appearance of this false positive edge for all phasing paths in  $H$ .

390 Notice that in either the general case of splitting  $v$  into two vertices, or the degenerate case of removing one  
 391 edge from  $G$ , after decomposing splittable vertex  $v$ , we have that  $U$  will be reduced by 1.

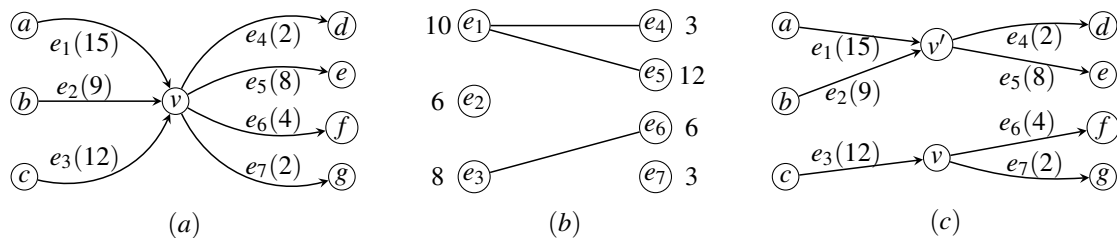

Figure 5: Example of decomposing a splittable vertex. **(a)** Subgraph associated with  $v$ . Assume that phasing paths contain  $(e_1, e_4)$ ,  $(e_1, e_5)$  and  $(e_3, e_6)$ . **(b)** Bipartite graph  $G_v$  with balanced weights next to vertices. Optimal decomposition gives  $S_v^{'*} = \{e_1, e_2\}$ ,  $T_v^{'*} = \{e_4, e_5\}$ . **(c)** Updated subgraph after decomposing  $v$ .

392 For the degenerated case of removing one edge from  $G$ , these spanning paths that contain this edge shall be  
 393 not covered by  $G'$ . For the usual case of splitting vertex this subroutine keeps all phasing paths  $H$  unchanged.

394 Finally, we define

$$\hat{z}(v) := |\bar{w}(S_v^*) - \bar{w}(T_v^*)| / (\bar{w}(S_v) + \bar{w}(T_v))$$

395 as the measurement to decide which splittable vertex to decompose (see line 4 of Algorithm 1).

396 **Decomposing Trivial Vertices.** There is a unique way to decompose a trivial vertex. Let  $v \in V$  be a  
 397 trivial vertex. Again, let  $S_v$  be the set of edges that point to  $v$ , and let  $T_v$  be the set of edges that leave  $v$ .  
 398 Without loss of generality, we assume that the in-degree of  $v$  is 1; let  $e = (u, v)$  be the only in-edge of  $v$ , i.e.,  
 399  $S_v = \{e = (u, v)\}$ . We denote by  $G'$  the updated splice graph after decomposing  $v$ . The construction of  $G'$   
 400 from  $G$  is to remove edge  $e$  from  $G$ , and merge  $u$  and  $v$  as a single vertex  $v$  (Figure 6). For each edge in  
 401  $e' \in T_v$ , we maintain the information that  $e'$  is preceded by an extra edge  $e$ , i.e., for  $e'$  in  $G$  we label it as  $ee'$   
 402 in  $G'$ . When we retrieve the paths *w.r.t.* the original splice graph (line 6 of Algorithm 1),  $ee'$  in  $G'$  will be  
 403 expanded as a pair of edges  $(e, e')$  in  $G$ . We then update the phasing paths  $H$ ; we denote by  $H'$  the updated  
 404 set of phasing paths. Consider two cases of a phasing path  $h \in H$  that contains  $e$ . If  $e$  is the last edge of  $h$ ,  
 405 i.e.,  $h = (\dots, e_1, e)$ , then we simply remove  $e$  from  $h$ , i.e., it becomes  $h' = (\dots, e_1) \in H'$ . Otherwise, if  $e$  is  
 406 not the last element of  $h$ , i.e.,  $h = (\dots, e, e_1, \dots)$ , we replace  $e$  and  $e_1$  as the edge  $ee_1$  in  $G'$ , i.e., it becomes  
 407  $h' = (\dots, ee_1, \dots) \in H'$ .

408 In the complete algorithm (Algorithm 1), we first decompose all nontrivial vertices before decomposing  
 409 any trivial vertex. In other words, when we use the above subroutine to decompose a trivial vertex, all  
 410 vertices in the current splice graph are trivial vertices. We now prove that, when the splice graph contains  
 411 only trivial vertices, our subroutine to decompose trivial vertex also preserves all phasing paths. Again,

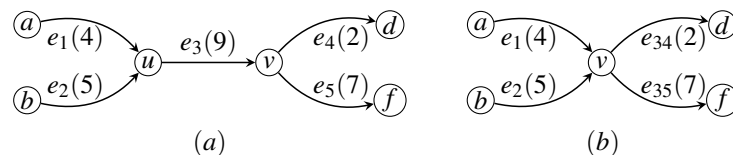

Figure 6: Illustration of decomposing trivial vertices  $v$ . **(a)** Subgraph before decomposing  $v$ . **(b)** Subgraph after decomposing  $v$ . Notice that we maintain the information that  $e_4$  and  $e_5$  are preceded by  $e_3$  by labeling them as  $e_{34}$  and  $e_{35}$ .

412 consider the two cases of a phasing path  $h \in H$  that contains  $e$ . If  $h = (\dots, e, e_1, \dots) \in H$ , then we have  
 413  $h' = (\dots, ee_1, \dots) \in H'$ , and  $h'$  is covered by  $G'$ . Since  $ee_1$  is essentially the concatenation of  $e$  and  $e_1$ ,  
 414 we have that  $G'$  covers  $h$ . For the other case that  $h = (\dots, e_1, e) \in H$ , we have that  $h' = (\dots, e_1) \in H'$ .  
 415 (Although  $G'$  covers  $h'$ , but this alone does not necessarily imply that  $G'$  covers  $h$  any more.) Let  $e_1 = (w, u)$   
 416 and  $e = (u, v)$  in  $G$ . Since we assume that all vertices in  $G$  are trivial vertices, in particular  $u$  is a trivial  
 417 vertex, we have that in  $G'$  all the succeeding edges of  $e_1$  are in the type of  $ee'$ , where  $e' \in T_v$  (see Figure 6).  
 418 In other words, for any path in  $G'$  that contains  $h'$ , the next edge of  $e_1$  in this path must be an concatenated  
 419 edge with preceding edge of  $e$ . Hence, we have that  $G'$  covers  $h$ .

420 We emphasize that if the splice graph contains nontrivial vertex, then decomposing a trivial vertex might not  
 421 preserve all phasing paths. Figure 7 gives such an example. Thus, it is essential to decompose all nontrivial  
 422 vertices before decomposing any trivial vertex.

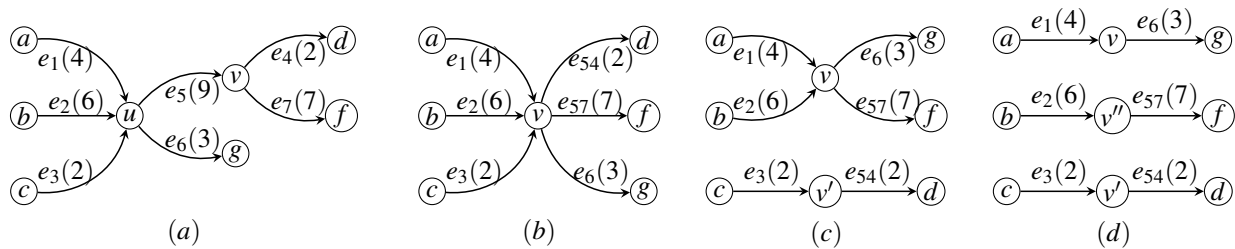

Figure 7: Decomposing a trivial vertex may not preserve all phasing paths if the splice graph contains nontrivial vertices. **(a)** Splice graph  $G$  with trivial vertex  $v$  and nontrivial vertex  $u$ . Assume that we have a single phasing path of  $H = \{(e_1, e_5)\}$ . **(b)** Updated splice graph  $G'$  after decomposing trivial vertex  $v$ . Notice that now we have  $H' = \{(e_1)\}$ . Since a phasing path with a single edge is not informative, we actually have that  $H' = \emptyset$ . **(c,d)** The following decomposition of  $G'$  by applying the subroutine for splittable vertices. Notice that in the final three  $s$ - $t$  paths, none of them covers  $(e_1, e_5)$ .

423 **Complete Algorithm.** Our complete algorithm for Problem 1 is to iteratively decompose vertices by applying  
 424 the above three subroutines, until finally the splice graph becomes a set of  $s$ - $t$  paths. The complete  
 425 algorithm is in Algorithm 1. Notice that when the Algorithm 1 reaches line 5, all vertices must be trivial  
 426 vertices. Among nontrivial vertices, we further give priority to unsplittable ones, since their decomposition  
 427 is fully determined by phasing paths.

---

**Algorithm 1:** Heuristic for Problem 1

---

**Input:**  $G$ ,  $w$ ,  $H$  and  $g$

**Output:**  $P$  and  $f$

1. Let  $V_1 \subset V \setminus \{s, t\}$  be the set of unsplittable vertices.
  2. Let  $V_2 \subset V \setminus \{s, t\}$  be the set of splittable vertices.
  3. **If**  $V_1 \neq \emptyset$ , compute  $v := \arg \min_{v' \in V_1} z(v')$ , decompose  $v$  by updating  $G$ ,  $w$  and  $H$ , and **goto** step 1.
  4. **If**  $V_2 \neq \emptyset$ , compute  $v := \arg \min_{v' \in V_2} \hat{z}(v')$ , decompose  $v$  by updating  $G$ , and **goto** step 1.
  5. Arbitrarily choose a (trivial) vertex  $v \in V \setminus \{s, t\}$ , decompose  $v$  by updating  $G$  and  $H$ , and **goto** step 1.
  6. For all the  $s$ - $t$  edges of  $G$ , recover the original  $s$ - $t$  paths as  $P$ ; set  $f$  as the corresponding weights of the edges.
- 

428 **Reference**

- 429 [32] B. Vatinlen, F. Chauvet, P. Chrétienne, and P. Mahey. Simple bounds and greedy algorithms for de-  
430 composing a flow into a minimal set of paths. *Eur. J. Oper. Res.*, 185(3):1390–1401, 2008.
- 431 [33] M. Shao and C. Kingsford. Efficient heuristic for decomposing a flow with minimum number of paths.  
432 *bioRxiv*, page 087759, 2016. doi: 10.1101/087759.

433 **Supplementary Figure 1**

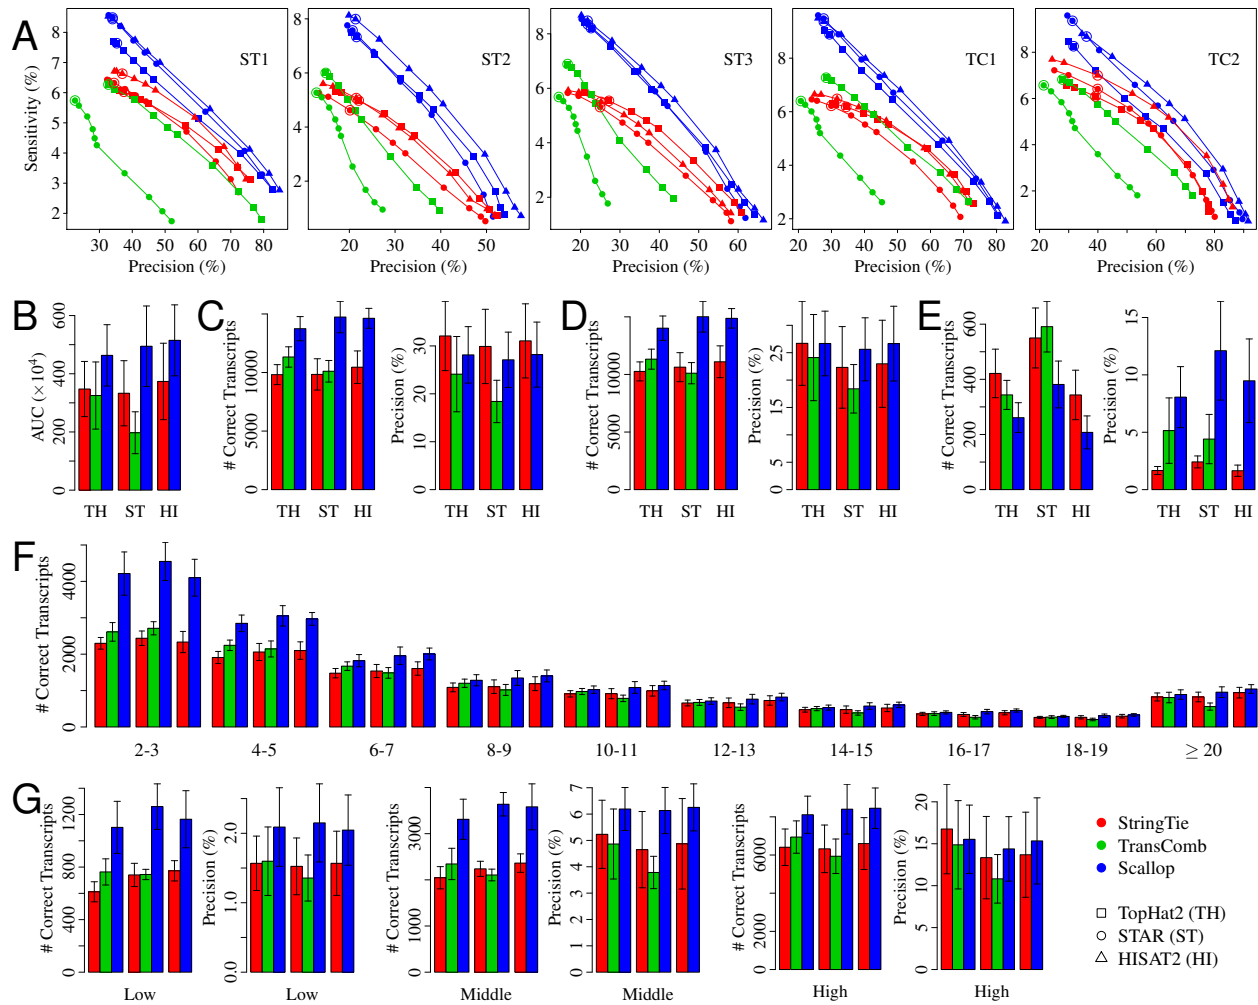

Supplementary Figure 1: Comparison of the three methods (StringTie, TransComb, and Scallop) over the 5 training samples. (A) The precision-sensitivity curves for multi-exon transcripts. Each curve connects 10 points, corresponding to the 10 different minimum coverage thresholds  $\{0, 1, 2.5, 5, 7.5, 10, 25, 50, 75, 100\}$ ; the default value of this parameter is circled. (B) The average AUC (area under the precision-sensitivity curve). The three groups of bars correspond to TopHat2, STAR, and HISAT2 alignments, respectively (the same for other panels). The error bars show the standard deviation over the 5 samples (the same for other panels). (C) The average sensitivity and precision of multi-exon transcripts for methods running with default parameters. (D) The average sensitivity and precision of multi-exon transcripts for methods running with minimum coverage set to 0. (E) The average sensitivity and precision of single-exon transcripts for methods running with default parameters. (F) The average number of correct transcripts with different number of exons for methods running with minimum coverage set to 0. (G) The average sensitivity and precision of multi-exon transcripts with each subset of transcripts (corresponding to low, middle, and high expression level) as ground truth for methods running with minimum coverage set to 0.



434 **Supplementary Figure 2**

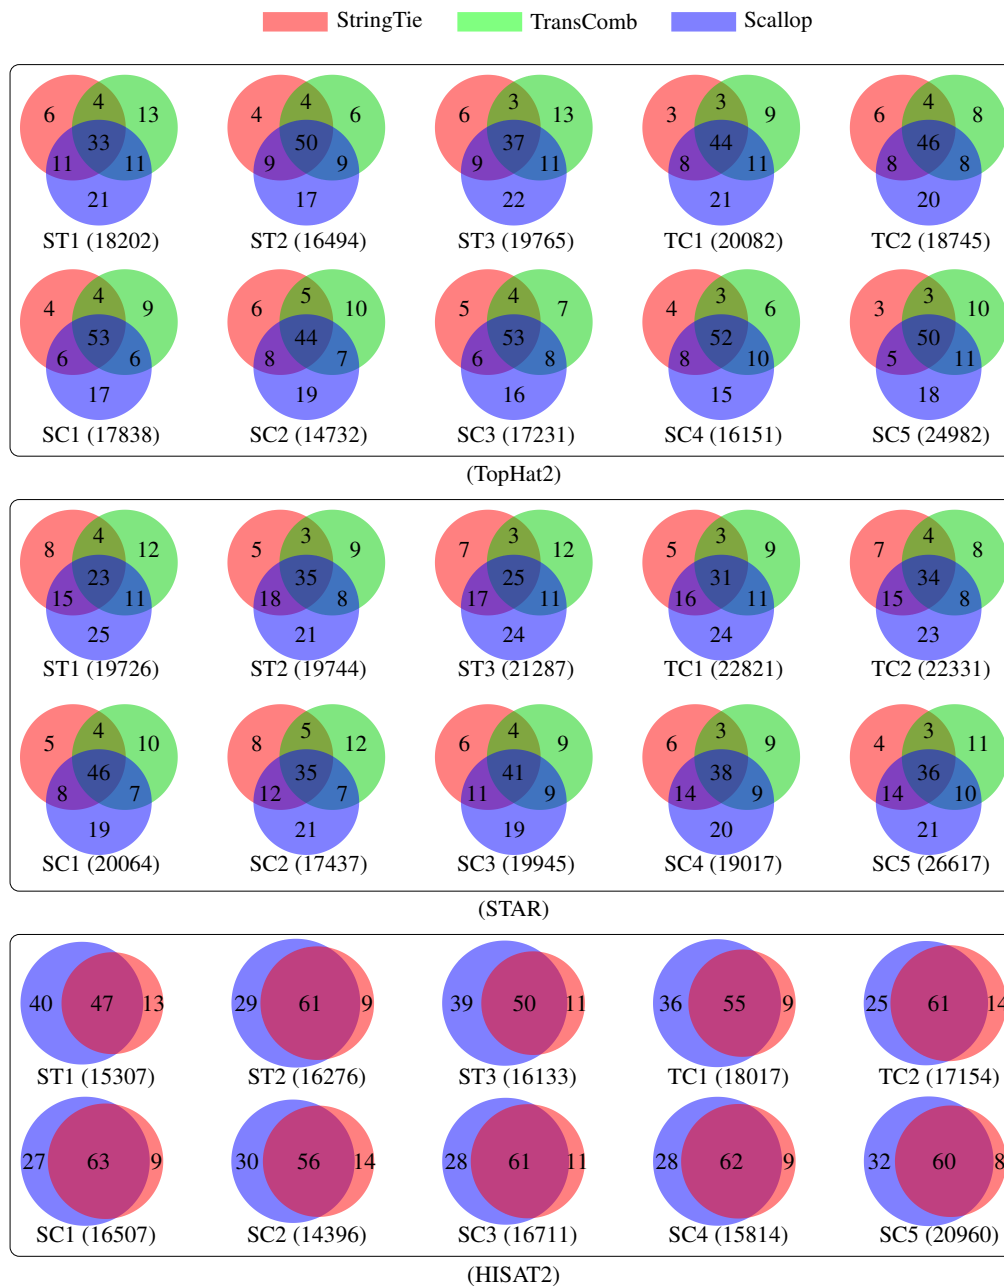

Supplementary Figure 2: Correlation among different assemblers. For each Venn diagram, the number in the parenthesis below gives the number of correct transcripts in the union of all three assemblers. The numbers inside the Venn diagram gives the percentage of the correct transcripts in the corresponding subset with respect to the union. The three assemblers are very diverse from each other. Specifically, the ratio between the number of correct transcripts shared by all the three assemblers and that in the union of them is 43.1% and 31.0% for TopHat2 and STAR alignments, respectively. With HISAT2 alignments, the ratio between the number of correct transcripts shared by StringTie and Scallop and that in the union of them is 57.5%.

435 **Supplementary Figure 3**

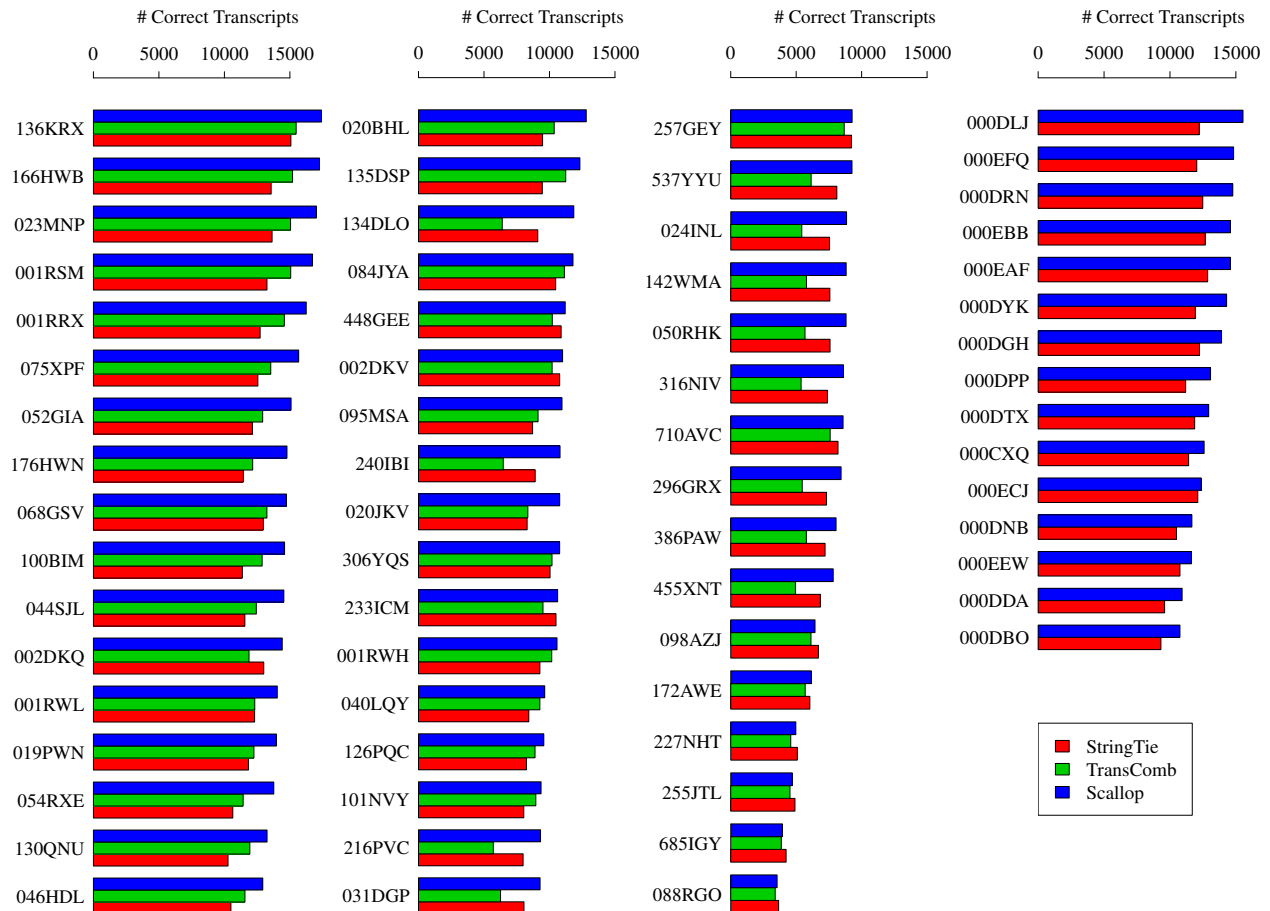

Supplementary Figure 3: Comparison of the adjusted sensitivity (shown as the number of correct transcripts) of multi-exon transcripts for methods (StringTie, TransComb, and Scallop) running with their default parameter settings. The experiment uses 50 strand-specific samples (leftmost three columns of this figure) and 15 non-strand-specific samples (the rightmost column of this figure). Read alignments for these samples were downloaded from ENCODE project (2013–present). For each sample, we mark its (partial) ID in ENCODE on the left side. The complete ID adds the prefix “ENCFF”. TransComb fails on the 15 non-strand-specific samples so for them we only compare the results given by Scallop and StringTie.

436 **Supplementary Figure 4**

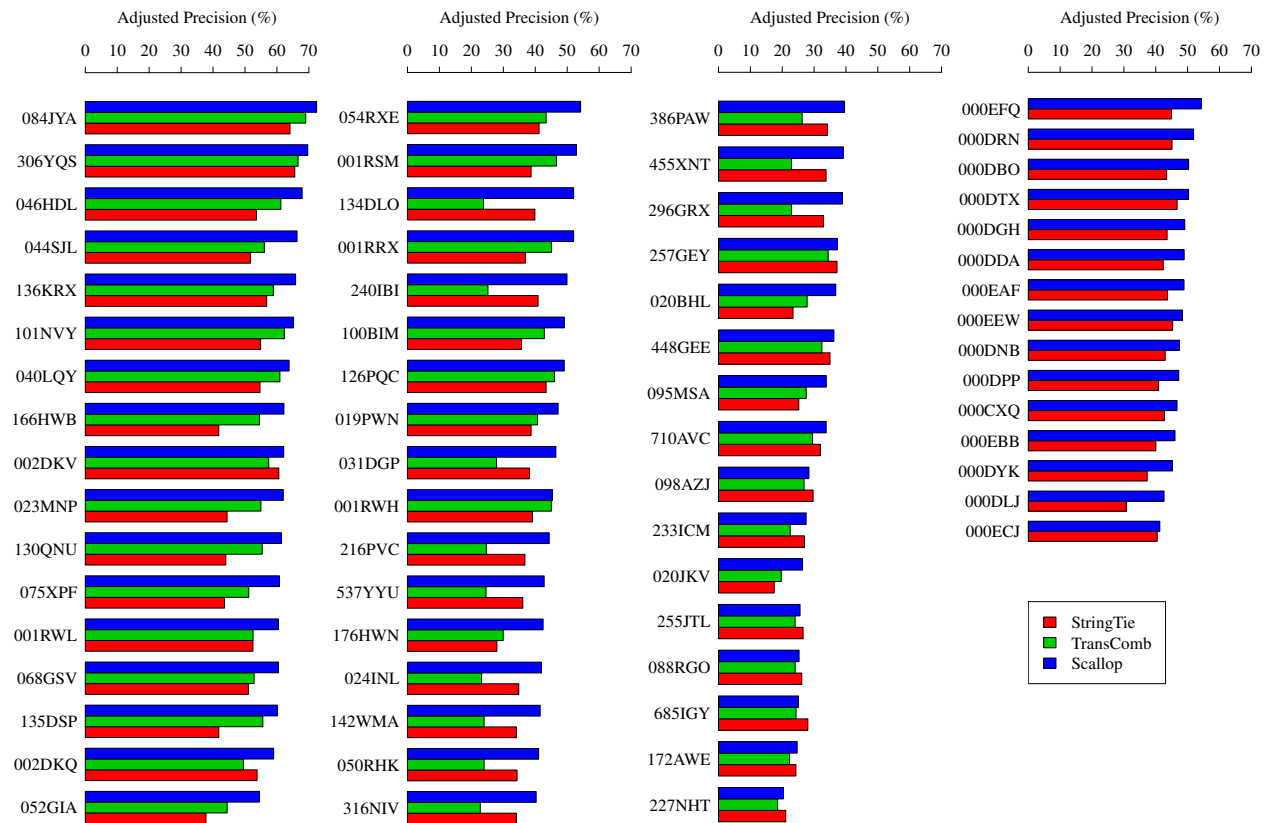

Supplementary Figure 4: Comparison of the adjusted precision of multi-exon transcripts for methods (StringTie, TransComb, and Scallop) running with their default parameter settings. The samples are identical to those in Supplementary Figure 3.

437 **Supplementary Figure 5**

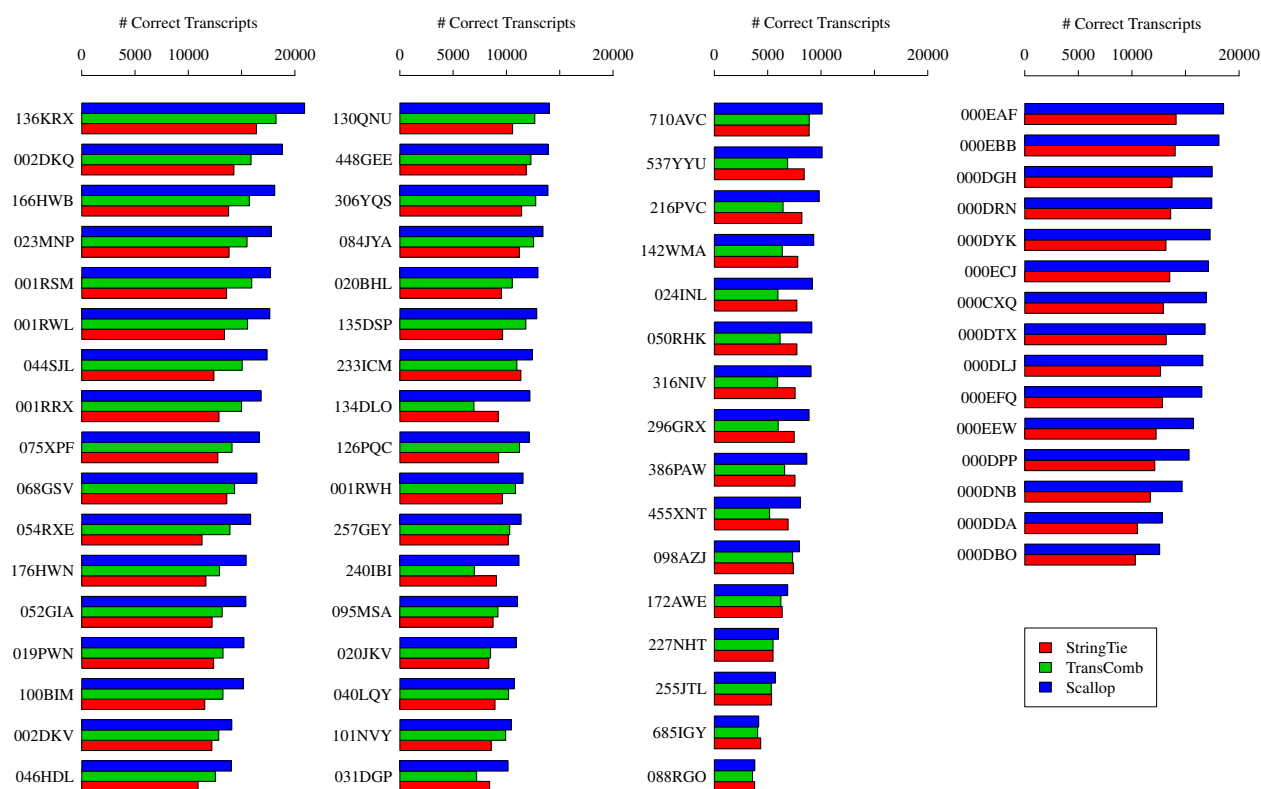

Supplementary Figure 5: Comparison of the adjusted sensitivity (shown as the number of correct transcripts) of multi-exon transcripts for methods (StringTie, TransComb, and Scallop) running with the minimum coverage threshold set to 0. The samples are identical to those in Supplementary Figure 3. Scallop produces higher adjusted sensitivity than StringTie on 64 out of the 65 samples, and than TransComb on all the 50 strand-specific samples. (TransComb fails on all non-strand-specific samples.) On average over the 50 strand-specific samples, Scallop obtains 24.1% and 18.7% more correct multi-exon transcripts (after adjustment) than StringTie and TransComb, respectively. Averaged over all the 15 non-strand-specific samples, Scallop finds 28.0% more correct multi-exon transcripts (after adjustment) than StringTie.

438 **Supplementary Figure 6**

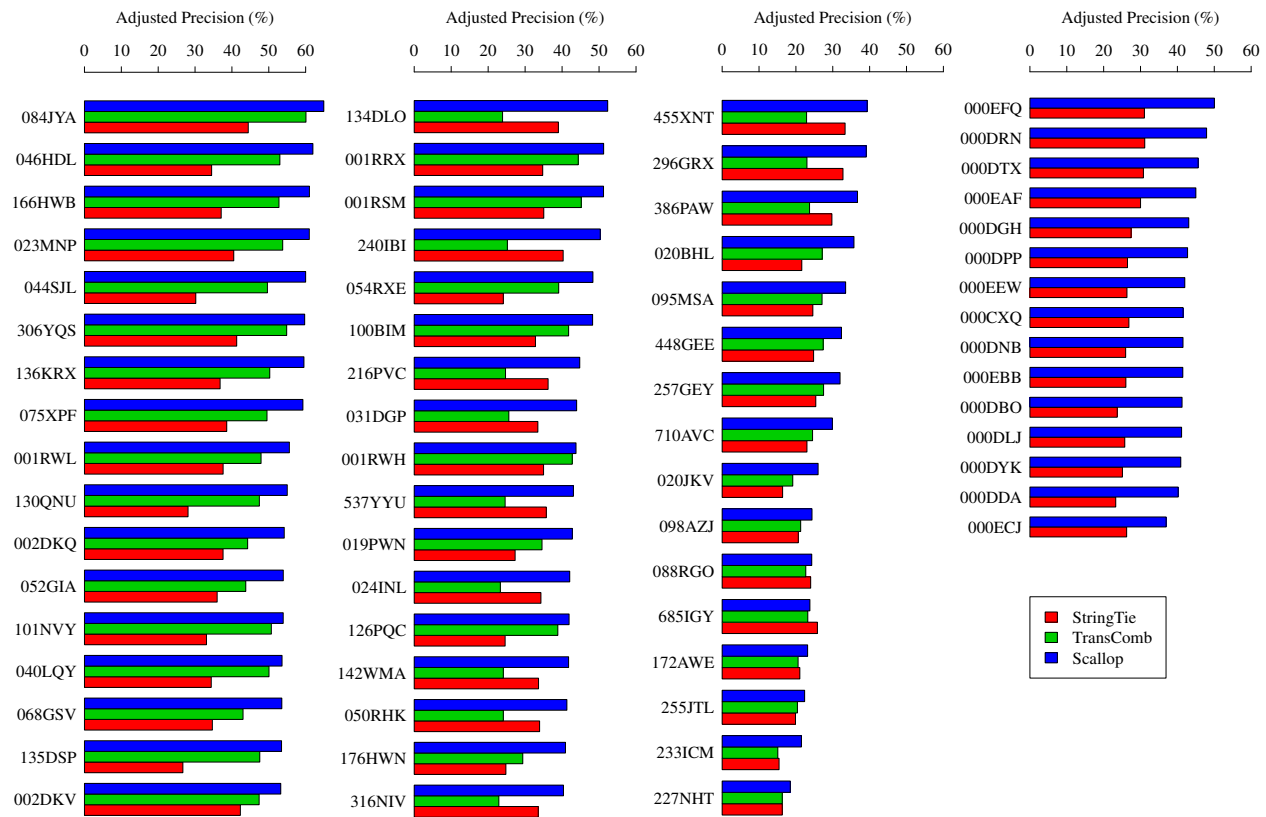

Supplementary Figure 6: Comparison of the adjusted precision of multi-exon transcripts for the three methods (StringTie, TransComb, and Scallop) running with the minimum coverage threshold set to 0. The samples are identical to those in Supplementary Figure 3. Scallop produces higher adjusted precision than StringTie on 64 out of the 65 samples, and than TransComb on all the 50 strand-specific samples. (TransComb fails on all non-strand-specific samples.) On the 50 strand-specific samples, the average adjusted precision is 30.9%, 34.8%, and 44.1% for StringTie, TransComb, and Scallop, respectively. On the 15 non-strand-specific samples, the average adjusted precision for Scallop is 42.8%, significantly outperforming StringTie at 27.1%.

439 **Supplementary Figure 7**

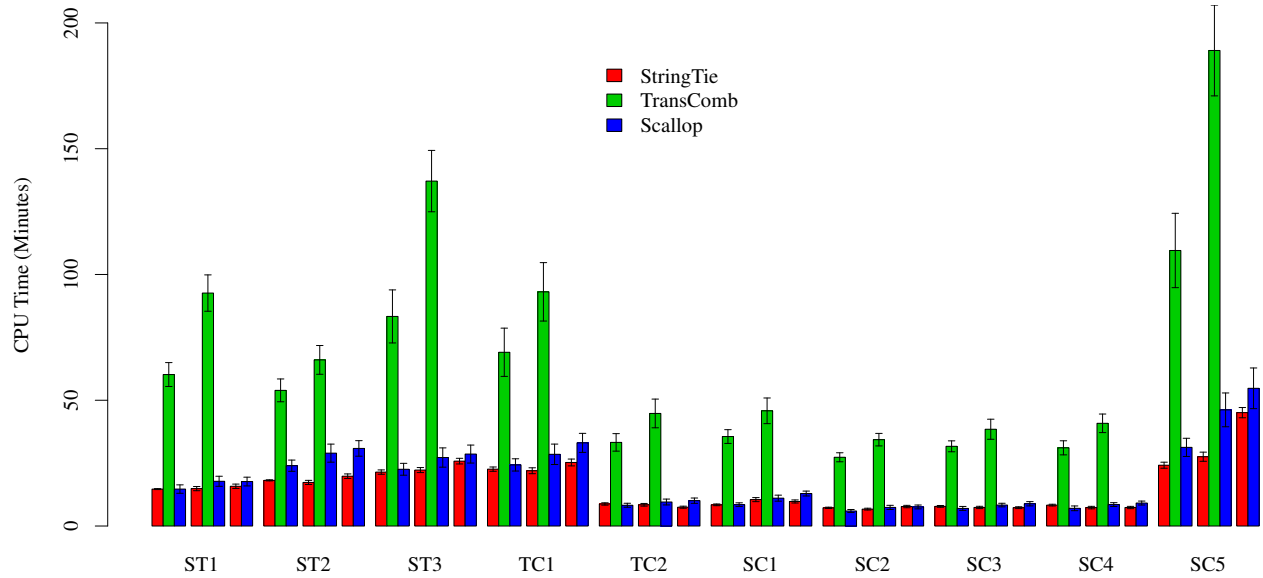

Supplementary Figure 7: Comparison of the running time (measured as CPU time) of the three assemblers (StringTie, TransComb, and Scallop) on 10 RNA-seq samples. All programs are run with their single-thread mode on a machine with 48 cores and 40GB RAM. The error bars show the standard deviation over the 10 runs with different minimum coverage parameters {0, 1, 2.5, 5, 7.5, 10, 25, 50, 75, 100}.

440 **Supplementary Table 1**

| Software   | Version  | Command Line                                                                                                                       |
|------------|----------|------------------------------------------------------------------------------------------------------------------------------------|
| StringTie  | 1.3.2d   | <code>stringtie bam-file strandness -c min-coverage</code>                                                                         |
| TransComb  | v.1.0    | <code>TransComb -b bam-file -s strandness -f min-coverage</code>                                                                   |
| Scallop    | v0.9.8   | <code>scallop -i bam-file -o gtf-file --library_type strandness --min_transcript_coverage min-coverage</code>                      |
| TopHat2    | v2.1.1   | <code>tophat2 -p 6 index fastq1 fastq2</code>                                                                                      |
| STAR       | 2.5.2a   | <code>STAR --outSAMstrandField intronMotif --chimSegmentMin 20 --runThreadN 6 --genomeDir index --readFilesIn fastq1 fastq2</code> |
| HISAT2     | 2.0.4    | <code>hisat2 -p 6 -x index -1 fastq1 -2 fastq2</code>                                                                              |
| gffcompare | v.0.9.9c | <code>gffcompare -r reference-gtf predicted-gtf</code>                                                                             |
| Salmon     | v.0.7.2  | <code>salmon quant -i index -l ISR -1 fastq1 -2 fastq2 -p 6</code>                                                                 |

Supplementary Table 1: Programs and their versions and arguments used in this paper.



441 **Supplementary Table 2**

| ID  | SRA Accession | GEO Accession | Chosen By | #Spots | Cell Line | Localization | Length |
|-----|---------------|---------------|-----------|--------|-----------|--------------|--------|
| ST1 | SRR534319     | GSM981256     | StringTie | 25M    | CD20+     | cell         | 76     |
| ST2 | SRR534291     | GSM981244     | StringTie | 114M   | IMR90     | cytosol      | 101    |
| ST3 | SRR545695     | GSM984609     | StringTie | 40M    | CD14+     | cell         | 76     |
| TC1 | SRR387661     | GSM840137     | TransComb | 125M   | K562      | cytosol      | 76     |
| TC2 | SRR307911     | GSM758566     | TransComb | 41M    | H1-hESC   | cell         | 76     |
| SC1 | SRR545723     | GSM984621     | Scallop   | 147M   | HMEpC     | cell         | 101    |
| SC2 | SRR315323     | GSM765399     | Scallop   | 30M    | NHEK      | nucleus      | 76     |
| SC3 | SRR307903     | GSM758562     | Scallop   | 36M    | BJ        | cell         | 76     |
| SC4 | SRR315334     | GSM765404     | Scallop   | 39M    | HeLa-S3   | cytosol      | 76     |
| SC5 | SRR534307     | GSM981252     | Scallop   | 167M   | MCF-7     | cytosol      | 101    |

Supplementary Table 2: Summary of the 10 RNA-seq samples used in this paper (except samples in Supplementary Figures 3). All these 10 samples are from human, and the sequencing employs paired-end and strand-specific protocols. All datasets are downloaded from ENCODE project (2003–2012).
